# Supplementary material for: Potential Phytotherapy of DSS-Induced Colitis: Ameliorating Reactive Oxygen Species-Mediated Necroptosis and Gut Dysbiosis with a New Crataegus pinnatifida Bunge Variety—Daehong
Source: MDPI journal article supplement (doi:10.3390/antiox13030340), 2024-03-12
Supplement: s1 [file s1]

**Supporting Information for**

**Potential Phytotherapy of DSS-Induced Colitis: Ameliorating ROS-mediated  
Necroptosis and Gut Dysbiosis with a New *Crataegus pinnatifida* Bunge Variety—  
Daehong**

Kang-In Lee<sup>1,6</sup>, Yousang Jo<sup>1,6</sup>, Heung-Joo Yuk<sup>1</sup>, Sun-Young Kim<sup>2,3</sup>, Hyungjun Kim<sup>1</sup>,  
Hye Jin Kim<sup>4</sup>, Soo-Keol Hwang<sup>5,\*</sup> and Ki-Sun Park<sup>1,\*</sup>

<sup>1</sup>KM Science Research Division, Korea Institute of Oriental Medicine, Daejeon 34054,  
Republic of Korea.

<sup>2</sup>College of Pharmacy, Chungbuk National University, Cheongju, 28160, Republic of  
Korea

<sup>3</sup>Department of Future Convergence Industry, Bio Health Industry Team, Sejong  
Technopark, Sejong-si 30141, Republic of Korea

<sup>4</sup>KM Convergence Research Division, Korea Institute of Oriental Medicine, Daejeon  
34054, Republic of Korea.

<sup>5</sup>Solwon Biotechnology, Sejong-si 30005, Republic of Korea

<sup>6</sup>These authors contributed equally.

\*Corresponding authors

E-mail address: [sookeol@hanmail.net](mailto:sookeol@hanmail.net) (S-K. H.), [kisunpark@kiom.re.kr](mailto:kisunpark@kiom.re.kr) (K-S. P.)

Tel.: +82-42-868-9662

**Supplementary Table S1. The morphological characteristics of DH and CP**

| <b>Plant Characteristics</b>  | <b>DH</b>                          | <b>CP</b>                            |
|-------------------------------|------------------------------------|--------------------------------------|
| Fruit Weight                  | 20~30g                             | 3~5g                                 |
| Fruit Diameter                | 2.5~4cm                            | 1.5cm                                |
| Presence of Thorns            | None                               | Present                              |
| Fruit Shape                   | Spherical, pentagonal stripes      | Spherical                            |
| Number of Flowers per Cluster | 12 on average                      | 5~6, maximum 15                      |
| Flower Size                   | Large (approx. 2x of CP)           | Small                                |
| Leaf Size                     | Approx. 10cm                       | Approx. 4cm                          |
| Leaf Base                     | Thin and long                      | Thick and short                      |
| Stem Color                    | Brown with white spots             | Grey with white spots                |
| Fresh Consumption             | Available due to rich flesh        | Unavailable, small and insipid       |
| Fruit Skin Color              | Large, clean, and non-bursting     | Small and prone to blemishes         |
| Fruit Color                   | Deep pink                          | Red or dark red                      |
| Storage Life                  | Long                               | Short                                |
| Leaf Underside                | Clean                              | Prominent leaf veins with fine hairs |
| Fruiting Period               | Early fruiting from the first year | Fruiting after 5 years               |
| Propagation Method            | Grafting (budding, veneer graft)   | Seed Sowing                          |
| Growth Habit                  | Umbrella shape                     | Umbrella shape                       |

**Supplementary Table S2. Antibodies for immunoblotting**

| <b>Antibody</b> | <b>Source</b>  | <b>Catalog No.</b> |
|-----------------|----------------|--------------------|
| RIP1            | Cell signaling | #3493              |
| p-RIP1          | Cell signaling | #65746             |
| RIP3            | Cell signaling | #10188             |
| p-RIP3          | Cell signaling | #93654             |
| MLKL            | Cell signaling | #14993             |
| p-MLKL          | Cell signaling | #91689             |
| p38             | Cell signaling | #9212              |
| p-p38           | Cell signaling | #9211              |
| ERK             | Cell signaling | #9102              |
| p-ERK           | Cell signaling | #4370              |
| JNK             | Cell signaling | #3708              |
| p-JNK           | Cell signaling | #4668              |
| COX-2           | Abcam          | Ab52237            |
| Tubulin         | Abcam          | Ab7291             |

**Supplementary Table S3. Literature evidences for the functionality of differentially abundant taxa.** q-value refers to the p-value from ALDEx2 adjusted by Benjamini-Hochberg procedure.

| <b>Taxon</b>                   | <b>DH-induced alteration (vs. DSS)</b> | <b>Gut-related functionality</b>                                                                                                                                                                            |
|--------------------------------|----------------------------------------|-------------------------------------------------------------------------------------------------------------------------------------------------------------------------------------------------------------|
| <i>Peptostreptococcaceae</i>   | Decreased (q = 0.0421)                 | Harmful;<br>- Positively correlated with genes in IBD-related pathway, MAPK3, VIPR1, PYGB, NCK2.<br>- Negatively correlated with gut-protective gene, ANXA1.                                                |
| <i>Akkermansia muciniphila</i> | Increased (q = 0.0092)                 | Beneficial;<br>- Reduced inflammation by the stimulation of endocannabinoids.<br>- Reinforce tight junction by extracellular vesicles.<br>- Promote intestinal epithelial development by metabolic products |
| <i>Bacteroides vulgatus</i>    | Decreased (q = 0.0408)                 | Harmful;<br>- <i>B. vulgatus</i> protease contributed to UC and transplantation to germfree mice induced colitis.                                                                                           |
| <i>PAC001081_s group</i>       | Decreased (q = 0.0017)                 | Harmful;<br>- Positively correlated with inflammation in the spleen.                                                                                                                                        |

**Supplementary Table S4. The abbreviations used in this study**

| <b>Abbreviation</b> | <b>Full name</b>                           |
|---------------------|--------------------------------------------|
| DH                  | Daehong                                    |
| CP                  | <i>Crataegus pinnatifida</i> Bunge         |
| IBD                 | inflammatory bowel diseases                |
| DSS                 | dextran sodium sulfate                     |
| 5-ASA               | 5-aminosalicylic acid                      |
| DMSO                | dissolved in dimethyl sulfoxide            |
| TEER                | transepithelial electrical resistance      |
| DCFDA               | 2',7'-dichlorodihydrofluorescein diacetate |
| SZ                  | Smac mimetic and z-VAD-fmk complex         |
| PBS                 | phosphate buffered saline                  |
| ROS                 | reactive oxygen species                    |
| ELISA               | enzyme linked immunosorbent assay          |
| H&E                 | Hematoxylin & eosin                        |
| OUT                 | operational taxonomy unit                  |
| ASV                 | amplicon sequence variants                 |
| PCoA                | principal coordinate analysis              |
| DAA                 | differential abundance analysis            |

## Supplementary Figure S1.

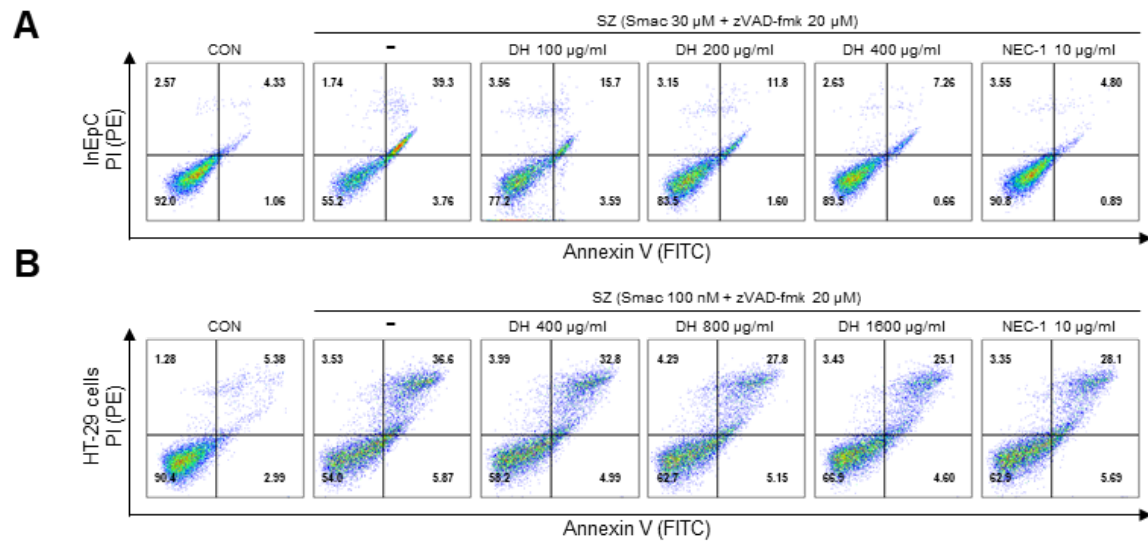

**Supplementary Figure S1. DH regulates necroptotic cell death.** FACS analysis of annexin V/PI-stained cells in InEpC (A), HT-29 (B).

## Supplementary Figure S2.

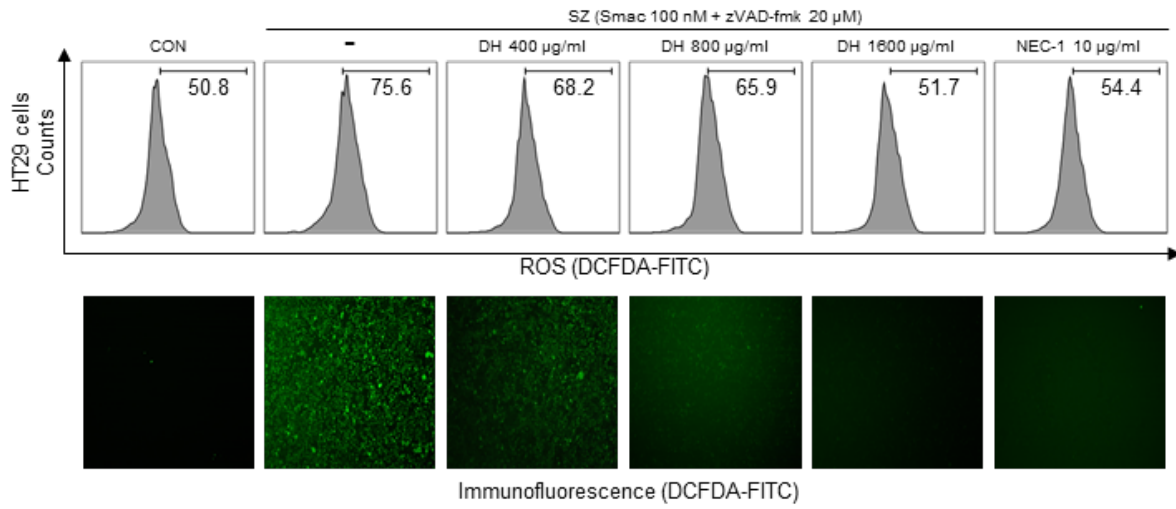

**Supplementary Figure S2. DH regulates ROS production.** FACS analysis of DCFDA in HT-29 cells.
